# Supplementary material
Source: publisher site journal article supplement (https://www.dovepress.com/get_supplementary_file.php?f=+408504.docx)
Supplement: Supplementary file 1 [file get_supplementary_file.php]

**Supplementary appendix**

**Table S1: Comparative dosing of ICS (GINA 2023 and NAEPP 2007)**

| **Inhaled corticosteroid** | **Total daily ICS dose (µg)** | | |
| --- | --- | --- | --- |
| **Low** | **Medium** | **High** |
| **GINA 2021 (adults and adolescents ≥12 years)** | | | |
| Beclometasone dipropionate (pMDI, standard particle, HFA) | 200–500 | >500–1,000 | >1,000 |
| Beclometasone dipropionate (DPI or pMDI, extrafine particle, HFA) | 100–200 | >200–400 | >400 |
| Budesonide (DPI or pMDI, standard particle, HFA) | 200–400 | >400–800 | >800 |
| Ciclesonide (pMDI, extrafine particle, HFA) | 80–160 | >160–320 | >320 |
| Fluticasone furoate (DPI) | 100 | | 200 |
| Fluticasone propionate (DPI) | 100–250 | >250–500 | >500 |
| Fluticasone propionate (pMDI, standard particle, HFA) | 100–250 | >250–500 | >500 |
| Mometasone furoate (DPI) | Depends on DPI device – see product information | | |
| Mometasone furoate (pMDI, standard particle, HFA) | 200–400 | | >400 |
| **NAEPP 2007 (adults and adolescents ≥12 years)** | | | |
| Beclomethasone HFA (40 or 80 µg/puff) | 80–240 | >240–480 | >480 |
| Budesonide DPI (90, 180, or 200 µg/inhalation) | 180–600 | >600–1,200 | >1,200 |
| Flunisolide (250 µg/puff) | 500–1,000 | >1,000–2,000 | >2,000 |
| Flunisolide HFA (80 µg/puff) | 320 | >320–640 | >640 |
| Fluticasone  HFA/pMDI (44, 110, or 220 µg/puff)  DPI (50, 100, or 250 µg/inhalation) | 88–264  100–300 | >264–440  >300–500 | >440  >500 |
| Mometasone DPI (200 µg/inhalation) | 200 | 400 | >400 |
| Triamcinolone acetonide (75 µg/puff) | 300–750 | >750–1,500 | >1,500 |

DPI, dry powder inhaler; GINA, Global Initiative for Asthma; HFA, hydrofluoroalkane; ICS, inhaled corticosteroid; NAEPP, National Asthma Education and Prevention Program; pMDI, pressurized metered dose inhaler

**Figure S1. Sample selection and attrition**

ICS-based maintenance

**n=214,533 (37.2%)**

SABA only

**n=362,861 (62.8%)**

Patients aged ≥4 years with prescription SABA between 2011–2017 (Index date=random SABA fill)

**n=11,972,304**

≥12-months pre-index and 12-months post-index continuous health plan eligibility

**n=5,720,508**

Diagnosisa of asthma in 12-month pre-index or within 60 days post-index, with ≥1 additional SABA fill and/or ≥1 maintenance medication fill and excluding other respiratory or chronic conditions that could be treated with SCSb

**n=1,134,143**

Patients aged ≥12 years with post-index ICS-based maintenance medication totaling >32 days’ supply and/or ≥1 additional SABA if no maintenancec

**n=577,394**

aEvidence of ≥1 inpatient or ≥2 non-diagnostic outpatient claims with separate dates; bPresence of chronic lower respiratory illness other than asthma, primary eosinophilic disorders, cancer, or an autoimmune disorder (conditions commonly treated with SCS) resulted in exclusion; cPatients with clinically implausible SCS exposures during the post-index period (outside the 1st–99.8th percentile) were excluded.

ICS, inhaled corticosteroids; SABA, short-acting β2-agonist; SCS, systemic corticosteroids.
